# Supplementary material for: Disparities in Social Support Systems for Youths With Type 1 Diabetes
Source: PubMed Central journal article supplement — Clin Diabetes. 2015 Apr;33(2):62–9. doi: 10.2337/diaclin.33.2.62 (PMC4398009; doi:10.2337/diaclin.33.2.62), 2015-04
Supplement: supp_33.2.62_Pending_Erratum_Walker.pdf [file supp_33.2.62_Pending_Erratum_Walker.pdf]

## Erratum

Ashby F. Walker, Desmond A. Schatz, Cathryn Johnson, Janet H. Silverstein, and Henry J. Rohrs

### Disparities in Social Support for Youths With Type 1 Diabetes. *Clinical Diabetes* 2015;33:62–69

In the print version of the article listed above, Figure 2 was inadvertently omitted and replaced by a duplicate of Figure 1B. The correct Figure 2 appears below. Also, a typographical error appeared in the text on p. 63. The sentence should have read, “We specifically focus on social support because of its importance for pediatric populations and its propensity to be changed through intervention, as opposed to other factors that may be more difficult to change.”

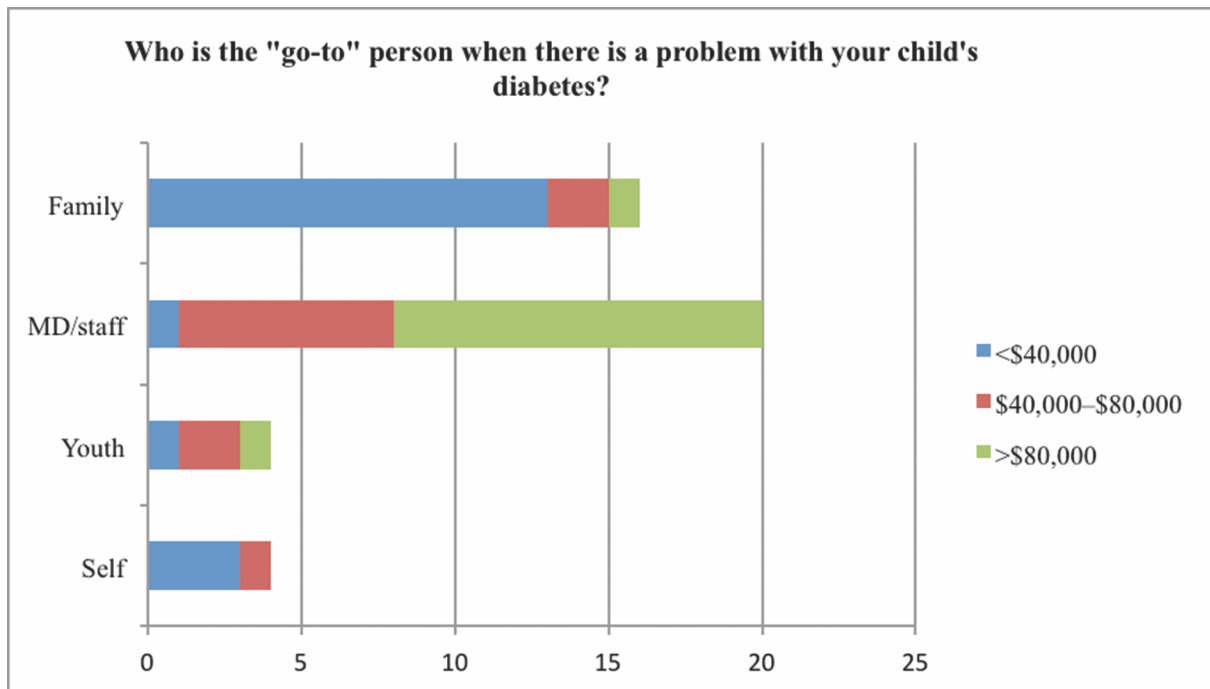

**FIGURE 2.** Parental support for diabetes care by total household income.

The erratum will appear in the Summer 2015 issue of *Clinical Diabetes*.
